# Supplementary material
Source: PubMed Central journal article supplement (PMC4007797)
Supplement: ml100046d_si_001.pdf [file ml100046d_si_001.pdf]

# New Crystal Form of HIV -1 Protease/Saquinavir Structure Reveals Carbamylation of N-Terminal Proline

Folasade M. Olajuyigbe, Nicola Demitri, Joshua O. Ajele, Elisa Maurizio, Lucio Randaccio and Silvano Geremia

*Centre of Excellence in Biocrystallography, Department of Chemical Sciences and Department of Life Science, University of Trieste, Viale Giorgeri 1, 34127 Trieste, Italy.*

## Supporting information

## *Experimental Section*

**Expression and purification of HIV-1 protease:** HIV-1 protease (PR) (Genbank HIVHXB2CG), stabilized by five mutations (Q 7 K, L 33 I and L 63 I to minimize auto-proteolysis, and C67A and C95 to pre-vent aggregation by the formation of disulfide bonds) was expressed in BL21-Gold strain (DE3)pLysS competent cells and purified from inclusion bodies (*I*). PR was purified on FPLC with eluting buffer, 50mM MES pH 6.5, 8 M Urea. The purified PR obtained in unfolded form was stored at 4°C as eluted fractions in 50mM MES pH 6.5, 8 M Urea for a week prior to refolding with saquinavir.

Purified sample of saquinavir (SQV) was generously supplied by Professor Benedetti's group of the University of Trieste, Italy.

**Refolding of PR with saquinavir:** The eluted PR fractions were serially diluted in ratio 1:1000 of 50 mM formic acid pH 2.5 and PR was concentrated to 2–5 mg mL<sup>-1</sup>. The pulsed dilution technique (2) was used to refold the PR with a 5-fold molar excess of SQV in 50 mM sodium acetate buffer, pH 4.5 (refolding buffer).

**Crystallization:** High throughput robotic crystallization screen using the Tecan Robot (Freedom EVO 100) was performed on HIV PR/SQV complexes. After screening optimal conditions for crystal growth, the manual hanging drop method was employed to grow crystals of suitable size for high resolution X-ray diffraction. PR/SQV crystals were grown by co-crystallization with the hanging drop, vapor-diffusion method at 20°C. The reservoir solution contained 0.25M citrate buffer (pH 6), 10% DMSO, and 20–40% saturated (NH<sub>4</sub>)<sub>2</sub>SO<sub>4</sub> as precipitant. The crystallization drops were formed using 1 μL of reservoir solution and 1 μL of protein solution. Crystals of typical dimension, 0.5 x 0.3 x 0.1 mm<sup>3</sup>, suitable for diffraction measurements grew within 2–7 days.

**Structure Determination and Crystallographic analysis:** Diffraction images were collected at XRD1 Beamline at the Elettra Synchrotron (Trieste, Italy) using a monochromatic wavelength of 1.2 Å. X-ray data were collected on 165 mm MAR-CCD detector from 100 K frozen crystal with 20 % glycerol as

cryoprotecting agent. Data were processed using the Mosflm suite (3). Protease coordinates (PDB code: 2AVV) were used as the starting model for molecular replacement with AmoRe. The structure was refined with SHELX (4) and refitted with the program COOT (5). Alternative conformations for residues were modeled where appropriate. Structural figures were made using PyMOL (6). The statistics for the processed diffraction data are given in Table 1. The atomic coordinates for the PR/SQV structure have been deposited in the Protein Data Bank with accession code 3K4V.

## REFERENCES

1. Louis, J. M., Clore, A. M. and Gronenborn, A. M. (1999) *Nat. Struct. Biol.* 6, 868-875.
2. Tsumoto, K., Ejima, D., Kumagai, I. and Arakawa, T. (2003) *Protein Expression and Purification* 28, 1-8.
3. Leslie, A. (1990) *Crystallographic Computing*, Oxford University Press, Oxford, UK.
4. Sheldrick, G. M. and Schneider, T. R. (1997) *Methods Enzymol.* 277, 319-343.
5. Emsley, P. and Cowtan, K. (2004) *Acta Crystallogr. D60*, 2126-2132 .
6. DeLano, W. L. (2002) *The PyMOL Molecular Graphics System*, DeLano Scientific LLC, San Carlos, CA, USA, <http://www.pymol.org>.

**Table 1S. X-ray data collection and refinement statistics.**

|                                     |                  |                            |
|-------------------------------------|------------------|----------------------------|
| Protease                            |                  | PR                         |
| Inhibitor                           |                  | SQV                        |
| Maximum resolution (Å)              |                  | 1.39                       |
| Space group                         |                  | P21                        |
| Unit cell dimensions (Å, °)         |                  | a = 51.2                   |
|                                     |                  | b = 62.7                   |
|                                     |                  | c = 59.1                   |
|                                     |                  | β = 98.4                   |
| Total reflections                   |                  | 68870                      |
| Used reflections                    |                  | 53954                      |
| Completeness (%)                    |                  | 97.8 (80.5) <sup>[a]</sup> |
| I/σ (I)                             |                  | 9.7 (2.0) <sup>[a]</sup>   |
| Multiplicity                        |                  | 2.9 (2.7) <sup>[a]</sup>   |
| Rmerge (I) (%)                      |                  | 8.4 (35.4) <sup>[a]</sup>  |
| Refinement:                         |                  |                            |
| R <sub>work</sub> (%)               |                  | 15.9                       |
| R <sub>free</sub> (%)               |                  | 22.7                       |
| Protein atoms                       |                  | 3136                       |
| Inhibitor atoms                     |                  | 98                         |
| Other atoms <sup>[b]</sup>          |                  | 23                         |
| Water molecules                     |                  | 189                        |
| RMS deviation from ideality         | Bond lengths (Å) | 0.009                      |
|                                     | Bond angles (Å)  | 0.028                      |
| Average B-factors (Å <sup>2</sup> ) |                  |                            |
| Protein main chain, side chains     |                  | 18.0, 24.7                 |
| Carbamyl group                      |                  | 29.7                       |
| Inhibitor atoms                     |                  | 15.3                       |
| Water molecules                     |                  | 33.2                       |
| Other atoms <sup>[c]</sup>          |                  | 22.1                       |

[a] Value in parentheses: highest resolution shell. [b] 2 YCN, 4 DMSO, 1 Cl<sup>-</sup>

[c] DMSO, Cl<sup>-</sup>

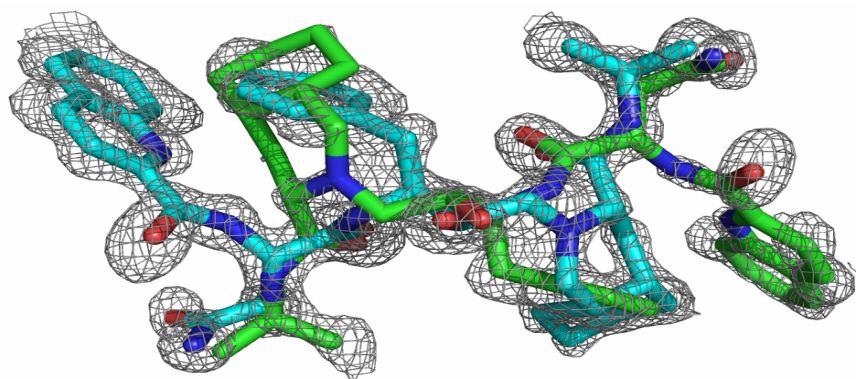

**FIGURE 1S.** *Electron density  $2Fo-Fc$  map (counter level at  $1.0\sigma$ ) of the catalytic channel of HIV-1 protease showing double orientation of saquinavir ligand.*

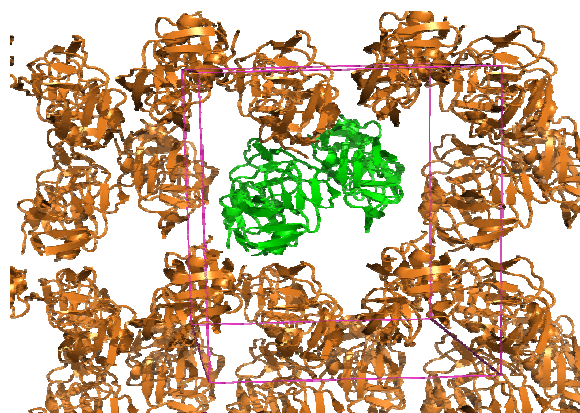

**FIGURE 2S.** *Crystal packing. The monoclinic crystal form in space group  $P2_1$  has two dimers in the asymmetric unit shown in green.*

**Liquid Chromatography / Mass Spectrometry analysis.** PR crystals were picked and washed in the mother liquor (reservoir solution) before putting into 5 $\mu$ L of MQ H<sub>2</sub>O. This was gently crushed with a needle and final dissolution of the crystals was achieved with the addition of 1 $\mu$ L of 2.5% trifluoroacetic acid (TFA). This solution was diluted to 25  $\mu$ L with MQ H<sub>2</sub>O. The sample containing about 100 ng of protein and 0.1% TFA was analysed by a 1200 series Agilent capillary HPLC system using an Agilent column (0.5 mm  $\phi$ , C18 SB300, 15 cm long). Proteins were separated by means of a linear water /acetonitrile gradient (water 0.05% TFA: solvent A, acetonitrile 0.05% TFA: solvent B. gradient: from 20% B to 70 %B in 50 min). Eluting proteins were directly analysed by ESI-MS using an HCT-ultra (Bruker) ion trap mass spectrometer scanning from 600 to 1500 (m/z). Protein molecular masses (Da) were obtained by deconvoluting m/z spectra.

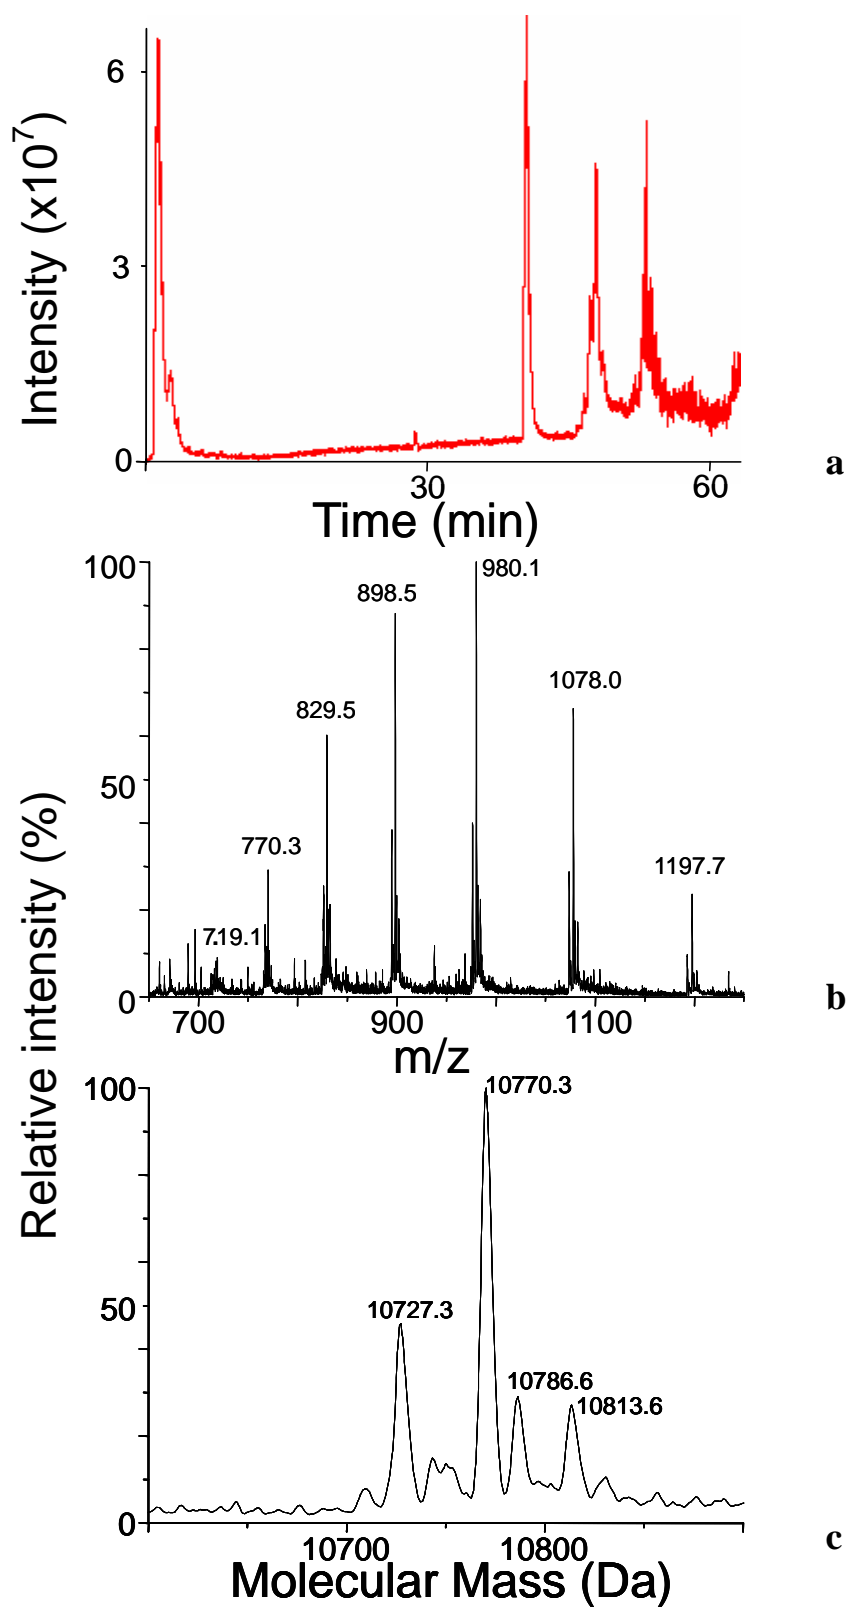

**FIGURE 3S. Liquid Chromatography / Mass Spectra: (a) LC Chromatogram; (b)  $m/z$  spectra; (c) deconvoluted  $m/z$  spectra.**
